1 **Pressure sensitivity of ANME-3 predominant anaerobic methane oxidizing**  
2 **community from coastal marine Lake Grevelingen sediment**

3 C. Cassarini<sup>a,b\*</sup>, Y. Zhang<sup>c</sup> and P. N. Lens<sup>a,b</sup>

4 <sup>a</sup>UNESCO-IHE, Institute for Water Education, P.O.Box 3015, 2601 DA , Delft, The Netherlands

5 <sup>b</sup>National University of Ireland Galway, University Road, Galway H91 TK33, Ireland

6 <sup>c</sup>State Key Laboratory of Microbial Metabolism, School of Life Sciences and Biotechnology,

7 Shanghai Jiao Tong University, Shanghai, People's Republic of China

8

9

10

11

12

13 \*Corresponding author

14 Chiara Cassarini

15 National University of Ireland Galway

16 University Road, Galway H91 TK33, Ireland

17 Phone: +31(0)152151715

18 e-mail: chiara.cassarini@gmail.com

## 19 **Abstract**

20 Anaerobic oxidation of methane (AOM) coupled to sulfate reduction is mediated by,  
21 respectively, anaerobic methanotrophic archaea (ANME) and sulfate reducing bacteria (SRB).  
22 When a microbial community from coastal marine Lake Grevelingen sediment, containing  
23 ANME-3 as the most abundant type of ANME, was incubated under a pressure gradient (0.1- 40  
24 MPa) for 77 days, ANME-3 was more pressure sensitive than the SRB. ANME-3 activity was  
25 higher at lower (0.1, 0.45 MPa) over higher (10, 20 and 40 MPa) CH<sub>4</sub> total pressures. Moreover,  
26 the sulfur metabolism was shifted upon changing the incubation pressure: only at 0.1 MPa  
27 elemental sulfur was detected in a considerable amount and SRB of the *Desulfobacterales* order  
28 were more enriched at elevated pressures than the *Desulfubulbaceae*. This study provides  
29 evidence that ANME-3 can be constrained at shallow environments, despite the scarce  
30 bioavailable energy, because of its pressure sensitivity. Besides, the association between ANME-  
31 3 and SRB can be steered by changing solely the incubation pressure.

## 32 **Importance**

33 Anaerobic oxidation of methane (AOM) coupled to sulfate reduction is a biological process  
34 largely occurring in marine sediments, which contributes to the removal of almost 90% of  
35 sedimentary methane, thereby controlling methane emission to the atmosphere. AOM is  
36 mediated by slow growing archaea, anaerobic methanotrophs (ANME) and sulfate reducing  
37 bacteria. The enrichment of these microorganisms has been challenging, especially considering  
38 the low solubility of methane at ambient temperature and pressure. Previous studies showed  
39 strong positive correlations between the growth of ANME and the methane pressure, since the  
40 higher the pressure the more methane is dissolved. In this research, a shallow marine sediment

41 was incubated under methane pressure gradients. The investigated effect of pressure on the  
42 AOM-SR activity, the formation sulfur intermediates and the microbial community structure is  
43 important to understand the pressure influence on the processes and the activity of the  
44 microorganisms involved to further understand their metabolism and physiology.

## 45 **Introduction**

46 Anaerobic oxidation of methane (AOM) coupled to sulfate reduction (SR) is a major sink in the  
47 oceanic methane (CH<sub>4</sub>) budget. The net stoichiometry of this reaction is shown in Eq. 1 (1):

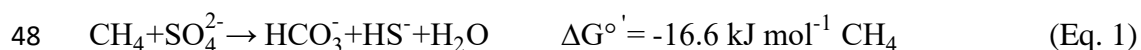

49 The thermodynamics of this reaction depend on the concentration of dissolved CH<sub>4</sub>. CH<sub>4</sub> is  
50 poorly soluble: 1.3 mM is its concentration in sea water at ambient pressure and at 15°C (2).  
51 Theoretically, an elevated CH<sub>4</sub> pressure favors the AOM coupled to SR (AOM-SR)  
52 bioconversion since i) the Gibbs free energy becomes more negative at higher CH<sub>4</sub> partial  
53 pressures and ii) the dissolved CH<sub>4</sub> concentration increases and is thus more bioavailable (Table  
54 1). Thus, the activity and the growth of the microorganisms mediating the process, namely  
55 anaerobic methanotrophs (ANME) and sulfate reducing bacteria (SRB), is expected to be higher  
56 at elevated pressures.

57 ANME are grouped into three distinct clades, i.e. ANME-1, ANME-2 and ANME-3 based on the  
58 phylogenetic analysis of their 16S rRNA genes (3-5). *In vitro* incubations of ANME-1 and  
59 ANME-2 dominated microbial communities from deep sea sediments in high-pressure reactors  
60 showed indeed a strong positive relation of the activity of the microorganisms capable of the  
61 AOM-SR process with the CH<sub>4</sub> partial pressure, up to 12 MPa (6-10). In the ANME-2 dominated

62 shallow marine sediment of Eckernförde Bay, the AOM-SR rate increased linearly with the CH<sub>4</sub>  
63 pressure from 0.00 to 0.15 MPa when incubated in batch, determining an affinity constant ( $K_m$ )  
64 for CH<sub>4</sub> at least higher than 0.075 MPa (1.1 mM) (11). The  $K_m$  for CH<sub>4</sub> of ANME-2 present in  
65 Gulf of Cadiz sediment is about 37 mM (9), which is equivalent to 3 MPa CH<sub>4</sub> partial pressure.  
66 This ANME-2 dominated sediment has its optimum pressure at the in situ pressure (S. Bhattarai,  
67 Y. Zhang, and P.N.L. Lens, submitted for publication). In contrast, the CH<sub>4</sub> partial pressure  
68 influenced the growth of different subtypes of ANME-2 and SRB (i.e. at 10.1 MPa only the  
69 ANME-2c and SEEP-SRB2 subtypes were enriched) from the Eckernförde Bay marine sediment  
70 incubated for 240 days in a high-pressure membrane capsule bioreactor (12).

71 Studying the effect of pressure on ANME and SRB will thus help understand the growth of the  
72 different ANME clades and their SRB partner. Finding ANME-SRB consortia that can grow fast  
73 at ambient pressure is of great importance for the application of AOM-SR in the desulfurization  
74 of industrial wastewater. Sulfate and other sulfur oxyanions, such as thiosulfate, sulfite or  
75 dithionite, are contaminants discharged in fresh water by industrial activities such as food  
76 processing, fermentation, coal mining, tannery and paper processing. Biological desulfurization  
77 under anaerobic conditions is a well-known biological treatment, in which these sulfur oxyanions  
78 are anaerobically reduced to sulfide (13-15). The produced sulfide precipitates with the metals,  
79 thus enabling their recovery (16). In the process of groundwater, mining or inorganic wastewater  
80 desulfurization, electron donor for sulfate reduction needs to be supplied externally. Electron  
81 donors such as ethanol, hydrogen, methanol, acetate, lactate and propionate (13) are usually  
82 supplied, but these increase the operational and investment costs (16). The use of easily  
83 accessible and low-priced electron donors such as CH<sub>4</sub> is therefore appealing for field-scale

84 applications (17). Moreover, from a logistic, economical and safety view point, bioreactors  
85 operating at ambient conditions are preferred over those operated at high pressures.

86 Coastal marine sediment from Lake Grevelingen (the Netherlands) hosts both ANME and SRB  
87 (18). Among the ANME types, ANME-3 is predominant, which makes this sediment a beneficial  
88 inoculum to investigate the effects of pressure on ANME-3. ANME-3 is often found in cold seep  
89 areas and mud volcanoes with high CH<sub>4</sub> partial pressures and relatively low temperatures (10,  
90 19, 20). Therefore, the shallow marine sediment from Lake Grevelingen was incubated at  
91 different pressures (0.1, 0.45, 10, 20, and 40 MPa) to study the influence of pressure on the  
92 AOM-SR activity, but also on the methanogenic activity and the potential formation of carbon,  
93 e.g. acetate or methanethiol, (21) and sulfur, e.g. elemental sulfur or polysulfides (22),  
94 intermediates. Moreover, phylogenetic analysis and visualization of microorganisms by  
95 fluorescence in-situ hybridization (FISH) were used to study the activity and the shifts in cell  
96 morphology, community composition and aggregation upon incubation of marine Lake  
97 Grevelingen sediment at different pressures in batch for 77 days.

## 98 **Results**

### 99 *Conversion rates of sulfur compounds*

100 The highest sulfide production rates of the coastal marine Lake Grevelingen sediment was in the  
101 incubations at the *in situ* pressure (0.45 MPa) and 10 MPa: 270 and 258  $\mu\text{mol g}_{\text{VSS}}^{-1} \text{d}^{-1}$ ,  
102 respectively (Figure 1a). The sulfide production rate at 40 MPa was 109  $\mu\text{mol g}_{\text{VSS}}^{-1} \text{d}^{-1}$ ,  
103 comparable to the rate with no CH<sub>4</sub> in the headspace, 99  $\mu\text{mol g}_{\text{VSS}}^{-1} \text{d}^{-1}$  (Figure 1a). Similarly,  
104 high SR rates were recorded for the incubations at 0.45 MPa and 10 MPa (Figure 1b): 297 and

105 278  $\mu\text{mol g}_{\text{VSS}}^{-1} \text{d}^{-1}$ , respectively. In contrast, the SR rate at 0.1 MPa was 257  $\mu\text{mol g}_{\text{VSS}}^{-1} \text{d}^{-1}$ ,  
106 while the sulfide production was only 157  $\mu\text{mol g}_{\text{VSS}}^{-1} \text{d}^{-1}$  (Figures 1b and 1a).

107 Sulfide was produced in almost all the incubations (Figure 2), with the exception of the  
108 incubation without biomass (Figure 2g). The sulfate concentration profiles varied with initial  
109 incubation pressure: at 0.45 MPa sulfate was reduced to sulfide in a 1:1 ratio (Figure 2b),  
110 whereas sulfate was not reduced anymore after 40 days of incubation at 40 MPa (Figure 2e). At  
111 0.45 MPa, 0.98 mmol of sulfate was consumed and exactly 0.98 mmol of total dissolved sulfide  
112 was produced, closing the sulfur balance. In the incubation at 0.1 MPa, 0.37 mmol of elemental  
113 sulfur was produced along with 0.54 mmol of sulfide (Figure 2a). In the other incubations at  
114 different pressures, hardly any elemental sulfur was formed (Figures 2c-2g). Instead, long chain  
115 polysulfides were formed along the incubation depending on the pressure (Figure 3), but in small  
116 amounts ( $\leq 2 \mu\text{mol}$  per vessel): 2  $\mu\text{mol S}_6^{2-}$  per vessel was determined at 0.45 MPa  $\text{CH}_4$  pressure  
117 (Figure 3b) and 1.2 and 1.4  $\mu\text{mol S}_6^{2-}$  per vessel at 10 MPa and 20 MPa, respectively (Figures 3c  
118 and 3d).

#### 119 *AOM rates*

120 The AOM rates were calculated from the DIC produced from  $^{13}\text{CH}_4$ , from which the  $K_m$  for  $\text{CH}_4$   
121 of the marine Lake Grevelingen sediment was determined to be around 1.7 mM. The DIC  
122 production rates followed a similar trend as the sulfide production rates: the highest rate was  
123 found at 0.45 MPa and the lowest rate at 40 MPa: 320 and 38  $\mu\text{mol g}_{\text{VSS}}^{-1} \text{d}^{-1}$ , respectively  
124 (Figure 1c). In the incubation at 0.45 MPa (*in situ* pressure), the total DIC produced from  $\text{CH}_4$   
125 was similar to the sulfide produced:  $\sim 0.9$  mmol per vessel (Supporting information, Figure S1b  
126 and Figure 2b). However, sulfide was produced from the start for all the incubations, while the

127 total DIC from CH<sub>4</sub> was mainly produced only after 40 days of incubation (Figure 2 and  
128 Supporting information, Figure S1). Similar trends were found for all the other incubations at  
129 different pressure, except for the vessel without CH<sub>4</sub>, where only sulfide production (0.3 mmol/  
130 vessel) was recorded.

### 131 *Methanogenesis*

132 CH<sub>4</sub> was produced in all the incubations, with the exception of the batches without biomass  
133 (Supporting information, Figure S2). The highest amount of CH<sub>4</sub> formed was recorded in the  
134 vessel at 0.1 MPa (Supporting Information, Figure S2b). The highest methanogenic rate was  
135 determined in the control vessel without CH<sub>4</sub> (N<sub>2</sub> in the headspace) and at 0.1 MPa: 44 and 31  
136 μmol g<sub>VSS</sub><sup>-1</sup> d<sup>-1</sup>, respectively, while it was below 5 μmol g<sub>VSS</sub><sup>-1</sup> d<sup>-1</sup> in all the other batch  
137 incubations (Supporting information, Figure S2a). Assuming that all the total <sup>12</sup>C-DIC was  
138 produced from the oxidation of other carbon sources than CH<sub>4</sub>, its production rate was low in  
139 almost all the incubations: lower than 3 μmol g<sub>VSS</sub><sup>-1</sup> d<sup>-1</sup>, except for the incubation without CH<sub>4</sub>  
140 (64 μmol g<sub>VSS</sub><sup>-1</sup> d<sup>-1</sup>, data not shown).

### 141 *Community shifts as a function of incubation pressure: total cell numbers*

142 The total bacterial and archaeal cellular numbers were accessed from Q-PCR data performed on  
143 samples after 77 days of incubation (Figure 4). The highest increase in active cells, from 6 to  
144 8×10<sup>7</sup> cells ml<sup>-1</sup>, was found in the incubation at the *in situ* pressure of 0.45 MPa. In the  
145 incubation at 40 MPa, the amount of active total bacteria and archaea cells decreased from 6.5 to  
146 5.8×10<sup>7</sup> cells ml<sup>-1</sup> (Figure 4a). Based on Q-PCR results, archaea grew in all the incubations,  
147 while copy numbers of bacteria decreased in the incubation without CH<sub>4</sub> and at 20 MPa. The  
148 total number of archaea increased the most in the incubation at 20 MPa (Figure 4b).

149 Based on the 16s rRNA gene analysis, both archaeal and bacterial communities had shifted along  
150 the 77 days incubation (Figure 5). The most abundant OTUs (operational taxonomic unit) with  
151 archaeal signature are shown in Figure 5a. Specifically, the abundance of ANME-3 among all the  
152 archaea increased the most in incubations at 0.45 and 0.1 MPa, i.e. respectively three and two  
153 times more than at the start of the incubation (Figure 5a). ANME-2a/b reads increased the most  
154 at 20 MPa: 27 times more than at the start of the incubation (Figure 5a). Sequences of  
155 methanogens, specifically belonging to the *Methanomicrobiales*, were more abundant after the  
156 incubation at 0.1 MPa, rather than at higher partial pressures, where *Thaumarchaeota* and  
157 *Woesearchaeota* were more abundant in incubations at 10, 20 and even 40 MPa (Figure 5a).

158 The bacterial communities were very diverse in all the incubations, the ones with the highest  
159 percentage are shown in Figure 5b. The absolute abundance of the *Desulfobulbaceae* (DBB) as  
160 calculated from their 16s rRNA gene according to Q-PCR and Miseq results increased or  
161 remained similar at the lower pressure incubations (0.1 and 0.45 MPa), but the percentage of  
162 DBB in the total bacterial community decreased at more elevated pressures (10, 20 and 40 MPa).  
163 Differently, the absolute abundance of *Desulfobacteraceae*, as DSS, increased in all the  
164 incubations at different pressures, with the highest percentage of reads retrieved in the incubation  
165 at 20 MPa (Figure 5b). The percentage of OTUs as assigned to *Desulfovibrio*, *Desulfuromonas*,  
166 *Halomonas* and *Sulfurovum* genes decreased in all the batch incubations (Figure 5b).

#### 167 *Community shifts as a function of incubation pressure: FISH analysis*

168 ANME-3 and DBB were visualized in all the batch incubations (Figures 6a-6c). At the start of  
169 the incubation (t = 0 days), ANME-3 cells were preferentially visualized in aggregates with other  
170 cells (data not shown). FISH images after 77 days of incubation showed variations in the



171 aggregate morphology depending on the incubation pressure (Figure 6). At 0.1 and 0.45 MPa,  
172 ANME-3 was more abundant than at the start, while the DBB cells were not found concomitant  
173 to the ANME-3 cells (Figure 6a) and, even if present, the ANME-3 cells outnumbered the DBB  
174 cells (Figure 6b). In the 10 MPa incubation, ANME-3 was visualized more scattered and not in  
175 clusters as at the lower pressures, whereas DBB cells were even more rarely pictured (Data not  
176 shown). At 20 MPa, ANME-3 and DBB cells were rare, however, the stained cells formed tight  
177 ANME-3/DBB aggregates (Figure 6c). At 40 MPa, ANME-3 and DBB were the least abundant  
178 and scattered and no aggregates could be found (data not shown).

179 Differently than ANME-3, more ANME-2 cells were visualized in the 77 days incubations at  
180 higher (10, 20 and 40 MPa) than at lower (0.1 and 0.45 MPa) incubation pressures (Figures 6d-  
181 6f). DSS, the most common SRB bacterial partner of ANME-2, were most abundant at 0.1 MPa.  
182 At lower pressure they were mainly visualized together with ANME-2 (Figure 6d). At 20 MPa  
183 only clusters of ANME-2 cells were visualized without DSS (Figure 6e).

## 184 **Discussion**

### 185 *Pressure effect on AOM in marine Lake Grevelingen sediment*

186 This study showed that AOM and SR processes in Lake Grevelingen sediment depend on the  
187 CH<sub>4</sub> total pressure. According to Eq. 1, the reaction rate is expected to be stimulated by the  
188 elevated CH<sub>4</sub> partial pressure when the other parameters remain the same (Table 1). This  
189 expectation has been commonly accepted and has been shown in communities dominated by  
190 ANME-1, i.e. hydrocarbon seep in the Monterey canyon sediment (23) and ANME-2, i.e.  
191 Eckernförde Bay (24, 25) and Gulf of Cadiz sediment (S. Bhattarai, Y. Zhang, and P.N.L. Lens,  
192 submitted for publication). In contrast, the AOM-SR process by the ANME-3 dominated marine

193 Lake Grevelingen sediment has an optimal pressure at 0.45 MPa among all tested conditions  
194 (Figure 1). This is in accordance with their natural habitat, i.e. the *in situ* pressure of marine Lake  
195 Grevelingen is 0.45 MPa, but contrasts the theoretical thermodynamic calculation (Table 1), that  
196 predicts a higher CH<sub>4</sub> solubility and thus a higher activity based on reported *K<sub>m</sub>* values, i.e. 37  
197 mM as calculated from an ANME-2 predominant enrichment originated from the Gulf of Cadiz  
198 (9). The calculated *K<sub>m</sub>* value on CH<sub>4</sub> based on our ANME-3 dominated inoculum is much lower  
199 than previously reported: around 1.7 mM. Thus, the ANME cells from Grevelingen marine  
200 sediment have a higher affinity for CH<sub>4</sub> than the ANME-2 from the Gulf of Cadiz, explaining  
201 why a higher pressure, i.e. higher dissolved CH<sub>4</sub> concentration, did not result in a higher AOM  
202 rate (Figure 1c). As a matter of fact, higher pressure resulted in a lower number of ANME-3 cells  
203 and ANME-3 proliferated only at lower pressures incubation (0.1 and 0.45 MPa). This indicates  
204 ANME-3 cells of marine Lake Grevelingen are non-piezophilic, which are easily damaged upon  
205 pressure elevation and require extra energy to cope with the damage (26). ANME-3 are found in  
206 cold seep areas and mud volcanoes with high CH<sub>4</sub> partial pressures (~10 MPa) and relatively low  
207 temperatures (10, 19, 20). However, Lake Grevelingen is a shallow sediment with high  
208 abundance of ANME-3 (18) and likely contains different subtypes than the ones found in deep  
209 sea sediments, which cannot cope with a high pressure.

#### 210 *Pressure effect on ANME types*

211 The ANME-3 type is usually visualized in association with DBB as sulfate reducing partner (10,  
212 19). FISH analysis showed that the DBB cells were not as high in number as the ANME-3 cells  
213 in any of the incubations (Figures 6a-6c), but they increased the most at the 0.1 MPa incubation  
214 (data not shown). In a recent study describing the microbial ecology of Lake Grevelingen  
215 sediment (incubation pressure = 0.1 MPa), the two species (ANME-3 and DBB) could not be

216 visualized together and the DBB cells were much less abundant than ANME-3 (18), similarly to  
217 this study (Figure 6a). At 0.1 and 0.45 MPa, ANME-3 cells were visualized in aggregates mainly  
218 detached from DBB cells (Figures 6a and 6b). ANME-3 cells have been visualized without  
219 bacterial partner before (20, 27), suggesting that this ANME type is supporting a metabolism  
220 independent of an obligatory bacterial association. In contrast, as ANME-3 and DBB decreased  
221 in number at higher pressures, most of the ANME-3 and DBB visualized at 20 MPa were  
222 forming small ANME-3/DBB clusters, suggesting that they have mutual benefits at this pressure  
223 (Figure 6c).

224 Sequences of ANME-2 were also found by Miseq analysis (Figure 5a) and visualized by FISH  
225 (Figures 6d-6f) in all incubations. ANME-2a/b cells were higher in number in the incubation at  
226 higher pressures (10 and 20 MPa). Also many DSS were found in all the batch incubations and,  
227 as for ANME-2, they were more abundant at higher pressures (10 and 20 MPa). ANME-2 and  
228 DSS were mainly visualized in aggregates (Figure 6d), especially at lower pressures (0.1 and  
229 0.45 MPa). The cooperative interaction between the ANME-2 and DSS is still under debate:  
230 Milucka et al. (22) stated that a syntrophic partner might not be required for ANME-2 and that  
231 they can be decoupled by using external electron acceptors (28), whereas recent studies have  
232 shown direct electron transfer between the two (ANME-2 and DSS) partners (29, 30). Besides,  
233 the DSS might have proliferated by growth on organic carbon compounds released by damaged  
234 or killed piezosensitive microorganisms.

### 235 *Effect of pressure on sulfur cycle in marine Lake Grevelingen sediment*

236 Figures 2 and 3 shows that the total pressure steers the sulfur cycling in the marine Lake  
237 Grevelingen sediment community. At 0.1 MPa CH<sub>4</sub> pressure, the reduced sulfate was converted

238 to both sulfide and zero-valent sulfur (Figure 2a). At 0.45 MPa (the incubation with the highest  
239 AOM-SR activity), the sulfur balance was closed by solely the sulfide production (Figure 2b).  
240 The production of elemental sulfur was repressed at elevated CH<sub>4</sub> pressures (Figure 2b-2e).  
241 Elemental sulfur has been considered as intermediate in the AOM-SR process, which is  
242 consumed by ANME to generate energy (22). Milucka et al. (22) showed that ANME-2 cells  
243 could stand along without the metabolic support of the bacterial partner, assuming that CH<sub>4</sub> was  
244 oxidized to bicarbonate and sulfate was reduced to disulfide (S<sub>2</sub><sup>2-</sup>) through zero-valent sulfur as  
245 an intracellular intermediate. The amount of disulfide or other polysulfides formed during the  
246 incubations (Figure 3) was very low, in most cases below the detection limit (0.1 μmol). The  
247 formation of these intermediate sulfur compounds in the ANME process needs to be further  
248 elucidated using e.g. isotopic labeled sulfate (<sup>35</sup>S) and nanometre scale secondary ion mass  
249 spectrometry (NanoSIMS) analysis.

250 A shift from sulfate reducers (e.g. *Desulfobacterales*) to sulfur reducers (e.g.  
251 *Desulforomonadales*) was observed in the bacterial community from low to high CH<sub>4</sub> partial  
252 pressure (Figure 5b). Sulfur reducing bacteria, e.g. *Desulfovibrio* or *Desulforomonas*, are more  
253 abundant at high CH<sub>4</sub> partial pressure (10, 20, 40 MPa), whereas sulfate reducing DBB are more  
254 abundant in the incubations at lower CH<sub>4</sub> total pressure (Figure 5b), where they were present in  
255 ANME-DBB aggregates and had the highest AOM-SR rates (Figure 1).

#### 256 *In vitro demonstration of SR-AOM supported ecosystem in Lake Grevelingen*

257 This study showed that CH<sub>4</sub> and sulfate were an effective energy source supporting SR-AOM in  
258 the microbial ecosystem from the marine Lake Grevelingen sediment (Figure 1). Apparent *in*  
259 *vitro* biomass growth was observed, especially at 0.45 MPa which is the *in situ* pressure, with

260 CH<sub>4</sub> and sulfate supplied as the sole energy sources (Figure 1). At incubation conditions similar  
261 to *in situ* conditions (p = 0.45 MPa, T = 15°C, pH = 7), the AOM and SR rates reached  
262 approximately 0.3 mmol g<sub>VSS</sub><sup>-1</sup> d<sup>-1</sup>. These rates are comparable or even higher than the *in vitro*  
263 AOM rates of ANME-1 or ANME-2 dominated biomass, e.g. the rate obtained after the  
264 enrichment of Eckernförde Bay sediment dominated by ANME-2 type cells for more than 800  
265 days in a continuous membrane bioreactor (31). Moreover, the AOM-SR rate measured in this  
266 study at 0.45 MPa is even higher than the AOM rate coupled to denitrification, which is  
267 thermodynamically much more favorable ( $\Delta G^0 = -924 \text{ kJ mol}^{-1} \text{ CH}_4$ ) (32) than AOM-SR ( $\Delta G^0 =$   
268  $-16.6 \text{ kJ mol}^{-1} \text{ CH}_4$ , Eq. 1).

269 It should be noted that even after two months incubation, the abundance of the responsible  
270 microorganisms, i.e. all detected types of ANME and SRB cells, is quite low:  $17.8 \times 10^5$  and  $11.4$   
271  $\times 10^5$  number of copies per mL of wet sediment of ANME-3 and ANME-2, respectively, in the  
272 total community (data not shown). The ANME-3 cells present in the marine Lake Grevelingen  
273 possess high specific AOM-SR rates and thus, can be of great potential to be applied in the  
274 industry after enrichment. The SR rate with CH<sub>4</sub> as electron donor should be around 100 mmol  
275 g<sub>VSS</sub><sup>-1</sup> d<sup>-1</sup> to be competitive with the SR rates achieved with other electron donors, such as  
276 hydrogen or ethanol (31, 33), which is still much higher than what was obtained in this study.

277 Methanogenic activity in marine Lake Grevelingen sediment was previously described by Egger  
278 et al. (34) and confirmed in this study at low pressure (0.1 MPa) or when no CH<sub>4</sub> was added in  
279 the incubation (Supporting Information, Figure S2). At 0.1 MPa, the CH<sub>4</sub> production rate was 31  
280  $\mu\text{mol g}_{\text{VSS}}^{-1} \text{ d}^{-1}$  and the AOM rate was  $186 \mu\text{mol g}_{\text{VSS}}^{-1} \text{ d}^{-1}$ . Trace CH<sub>4</sub> oxidation occurs during  
281 methanogenesis and the archaea involved compete with SRB for acetate (12, 24). Thus, the

282 determined AOM at 0.1 MPa cannot account for the net AOM-SR, as it is partly due to the  
283 methanogenic activity.

284 At high pressures (0.45, 10 MPa), AOM-SR was preferred (Figure 1) over methanogenesis  
285 (Supporting Information, Figure S2). Methanogenesis becomes less thermodynamically  
286 favorable at high pressures, less free energy ( $12 \text{ kJ mol}^{-1}$  less) is released upon changing the  
287 incubation pressure from 0.1 to 10 MPa (24). Timmers et al. (12) found that at 10 MPa net  
288 AOM-SR occurred, while at 0.1 MPa methanogenesis and trace  $\text{CH}_4$  oxidation dominated. In this  
289 study, the optimal AOM-SR was 0.45 MPa: the SR activity decreased at pressures higher than 10  
290 MPa, while AOM activity already decreased at pressures higher than 0.45 MPa (Figures 1b and  
291 1c).

## 292 **Conclusions**

293 This is the first study showing that the active ANME from the shallow marine Lake Grevelingen  
294 sediment preferred lower (0.1 and 0.1 MPa) over elevated (10, 20, 40 MPa) pressures, in contrast  
295 to previous studies that show strong positive correlations between the growth of ANME-1/2 and  
296 the  $\text{CH}_4$  pressure. Pressure steered the abundance and structure of the different types of ANME  
297 and SRB. The ANME-3 type was predominantly enriched in incubations at low pressures,  
298 whereas high pressures enhanced ANME-2 proliferation. Similarly, a shift from sulfate reducers  
299 to sulfur reducers was observed in the bacterial community from low (0.1 and 0.45 MPa) to high  
300 (10, 20, 40 MPa)  $\text{CH}_4$  partial pressure. This research highlights that ANME-3 from marine Lake  
301 Grevelingen can be enriched at rather low  $\text{CH}_4$  partial pressures, which is important to further  
302 understand their metabolism and physiology.

## 303 **Materials and Methods**

304 *Site description and sampling procedure*

305 The sediment was obtained from the Scharendijke Basin in the marine Lake Grevelingen (water  
306 depth of 45; position 51° 44.541' N; 3° 50.969' E), which is a former estuary in the southwestern  
307 part of the Netherlands. The sampling site characteristics, biochemical processes and the  
308 microbial community composition have been described previously (18, 34-36). Coring was done  
309 in November 2013 on the vessel R/V Luctor by the Royal Netherlands Institute for Sea Research  
310 (Yerseke, the Netherlands). The sampling procedure has been described in Bhattarai et al. (18),  
311 the sediment was kept at 4 °C in the dark in serum bottles with a headspace of CH<sub>4</sub> until use.

312 *Experimental design*

313 The effect of the pressure on the CH<sub>4</sub> oxidation, SR and CH<sub>4</sub> production rate of the marine Lake  
314 Grevelingen sediment was assessed with 0.07 (± 0.01) g volatile suspended solids (g<sub>vss</sub>) in 200  
315 ml pressure vessels incubated in triplicates at 0.1 MPa, 0.45 MPa (mimicking the in situ  
316 conditions), 10 MPa, 20 MPa and 40 MPa. The vessels were flushed and pressurized with 100 %  
317 CH<sub>4</sub>, from which about 20% was <sup>13</sup>C-labeled CH<sub>4</sub> (<sup>13</sup>CH<sub>4</sub>). The marine Lake Grevelingen  
318 sediment used as inoculum was incubated with artificial saline mineral medium with sulfate (10  
319 mM) at 15°C for 77 days. Two different control incubations were prepared in triplicates at 0.45  
320 MPa: without biomass and without CH<sub>4</sub>, but with nitrogen in the headspace.

321 Slurry samples were taken every week for chemical analysis. Approximately 1 mL sample was  
322 taken by attaching a connector and a vacuum tube to the exit port while gently opening the tap.  
323 Weight and pressure were measured in the vacuum tube before and after sampling. Pressure in  
324 each vessel was restored by adding fresh basal medium using a high performance liquid  
325 chromatography (HPLC) pump (SSI, USA).

326 *Chemical analysis*

327 The gas composition was measured on a gas chromatograph-mass spectrometer (GC-MS Agilent  
328 7890A-5975C). The GC-MS system was composed of a Trace GC equipped with a GC-GasPro  
329 column (30 m by 0.32 mm; J & W Scientific, Folsom, CA) and an Ion-Trap MS. Helium was the  
330 carrier gas at a flow rate of 1.7 ml min<sup>-1</sup>. The column temperature was 30°C. The fractions of  
331 CH<sub>4</sub> and CO<sub>2</sub> in the headspace were derived from the peak areas in the gas chromatograph, while  
332 the fractions of <sup>13</sup>CH<sub>4</sub>, <sup>12</sup>CH<sub>4</sub>, <sup>12</sup>CO<sub>2</sub> and <sup>13</sup>CO<sub>2</sub> were derived from the mass spectrum as done by  
333 (37).

334 Total dissolved sulfide was measured by using the methylene blue method (Hach Lange method  
335 8131) and a DR5000 Spectrophotometer (Hach Lange GMBH, Düsseldorf, Germany). Samples  
336 for sulfate and thiosulfate analysis were first diluted in a solution of zinc acetate (5 g/L) and  
337 centrifuged at 13,200g for 3 min to remove insoluble zinc sulfide, and filtrated through 0.45 µm  
338 membrane filters. Sulfate and thiosulfate concentrations were then determined by ion  
339 chromatography (Metrohm 732 IC Detector) with a METROSEP A SUPP 5 - 250 column. The  
340 pH was checked by means of pH paper.

341 Polysulfides were methylated using the protocol by Kamyshny et al. (38) and analyzed by  
342 reversed-phase HPLC. Elemental sulfur from the slurry sample was extracted using methanol  
343 following the method described by Kamyshny et al. (39), but modified for small volumes.  
344 Dimethylpolysulfanes and extracted elemental sulfur were analyzed by an HPLC (HPLC 1200  
345 Series, Agilent Technologies, USA) with diode array and multiple wavelength detector. A  
346 mixture of 90% MeOH and 10% water was used as eluent. A reversed phase C-18 column  
347 (Hypersil ODS, 125 × 4.0 mm, 5 µm, Agilent Technologies, USA) was used for separation.



348 Concentrations of dimethylpolysulfanes from  $\text{Me}_2\text{S}_3$  to  $\text{Me}_2\text{S}_7$  were calculated from calibration  
349 curves of polysulfides standards prepared following the protocol of Milucka et al. (22). UV  
350 detector response to  $\text{Me}_2\text{S}_8$  was calculated by the algorithm discussed in Kamyshny et al. (40).

351 The VSS was estimated at the beginning of the experiment on the basis of the difference between  
352 the dry weight total suspended solids and the ash weight of the sediment according to the  
353 procedure outlined in Standard Method (41).

#### 354 *Rate calculations*

355 Both AOM and SR rates were expressed as  $\mu\text{mol}$  of sulfide or dissolved inorganic carbon (DIC)  
356 production per gram of VSS per day ( $\mu\text{mol g}_{\text{VSS}}^{-1} \text{d}^{-1}$ ). For the AOM rate calculation, the total  
357 production of  $^{13}\text{C}$ -carbonate species ( $^{13}\text{C}$ -DIC), i.e.  $^{13}\text{CO}_2$  in both liquid and gas phases,  $\text{H}^{13}\text{CO}_3^-$   
358 and  $^{13}\text{CO}_3^{2-}$  in liquid phase, were first calculated. Considering that only 20% of  $\text{CH}_4$  was  $^{13}\text{CH}_4$ ,  
359 the total  $^{13}\text{C}$ -DIC was divided by the fractional abundance of  $^{13}\text{C}$  in the  $\text{CH}_4$  measured and used  
360 for each batch to determine the total amount of DIC produced from  $\text{CH}_4$  oxidation (42). For  
361 methanogenesis and for the formation of carbonate species from other carbon sources than  $\text{CH}_4$ ,  
362  $^{12}\text{CH}_4$  and  $\text{H}^{12}\text{CO}_3^-$  were taken respectively, and divided by the  $^{12}\text{C}$  fractional abundance. A line  
363 was plotted over the period where the decrease or increase of the different compounds ( $^{12}\text{CH}_4$ ,  
364  $^{13}\text{CH}_4$ ,  $\text{H}^{12}\text{CO}_3^-$ ,  $\text{H}^{13}\text{CO}_3^-$ , total dissolved sulfide and sulfate) was linear (at least four consecutive  
365 points) to estimate the rates (24), which were divided by the biomass content in the vessels ( $0.07$   
366  $\pm 0.01 \text{ g}_{\text{VSS}}$  in each vessel).

#### 367 *DNA extraction*

368 DNA was extracted by using a FastDNA<sup>®</sup> SPIN Kit for soil (MP Biomedicals, Solon, OH, USA)  
369 by following the manufacturer's protocol. Approximately 0.5 g of the sediment was used for

370 DNA extraction from the initial inoculum and ~0.5 ml of liquid obtained by washing the  
371 polyurethane foam packing with nuclease free water was used for extracting DNA from the  
372 enriched slurry. The extracted DNA was quantified and quality was checked as described by  
373 Bhattarai et al. (18).

#### 374 *PCR amplification for 16S rRNA genes and Illumina Miseq data processing*

375 The DNA was amplified using bar coded archaea specific primer pair Arc516F and reverse  
376 Arc855R. The PCR reaction mixture was prepared as described by Bhattarai et al. (18), however,  
377 the PCR amplification was performed using a touch-down temperature program. PCR conditions  
378 consisted of a pre-denaturation step of 5 min at 95°C, followed by 10 touch-down cycles of 95°C  
379 for 30 sec, annealing at 68°C for 30 sec with a decrement per cycle to reach the optimized  
380 annealing temperature of 63°C and extension at 72°C. This was followed by 25 cycles of  
381 denaturation at 95°C for 30 sec and 30 sec of annealing and extension at 72°C. The final  
382 elongation step was extended for 10 min.

383 The primer pairs used for bacteria were forward bac520F 5'-3' AYT GGG YDT AAA GNG and  
384 reverse Bac802R 5'-3' TAC NNG GGT ATC TAA TCC (43). The following program was used:  
385 initial denaturation step at 94°C for 5 min, followed by denaturation at 94°C for 40 sec, annealing  
386 at 42 °C for 55 sec and elongation at 72°C for 40 sec (30 cycles). The final elongation step was  
387 extended to 10 min. 5 µl of the amplicons were visualized by standard agarose gel  
388 electrophoresis (1% agarose gel, a running voltage of 120 V for 30 min, stained by gel red) and  
389 documented using a UV transilluminator with Gel Doc XR System (Bio-Rad, USA).

390 After checking the correct band size, 150 µl of PCR amplicons were loaded in 1% agarose gel  
391 and electrophoresis was performed for 120 min at 120 V. The gel bands were excited under UV

392 light and the PCR amplicons were cleaned using E.Z.N.A.<sup>®</sup> Gel Extraction Kit by following the  
393 manufacturer's protocol (Omega Biotek, USA). The purified DNA amplicons were sequenced by  
394 an Illumina HiSeq 2000 (Illumina, San Diego, USA) and analyzed according to the procedure  
395 described in Bhattarai et al. (18). A total of 40,000 ( $\pm$  20,000) sequences were assigned to  
396 archaea and bacteria examining the tags assigned to the amplicons. More detailed analytical  
397 procedure has been described by Bhattarai et al. (18). These sequence data have been submitted  
398 to the NCBI GenBank database under BioProject accession number PRJNA415004 (direct link:  
399 <http://www.ncbi.nlm.nih.gov/bioproject/415004>).

#### 400 *Quantitative real-time PCR (Q-PCR)*

401 Archaeal and bacterial clones were used to prepare Q-PCR standard. Plasmids were isolated  
402 using the Plasmid Kit (Omega Biotek, USA). The plasmid was digested with the EcoR I enzyme.  
403 After digestion purification was done by gel extraction (Gel extraction Kit, Omega Biotek,  
404 USA). The copy number was calculated from the total mass and the nucleic acid concentration.  
405 Extracted DNA from the sediment at the start and at the end of the incubation period (11 weeks)  
406 was used for qPCR analysis to quantify archaea and bacteria. Amplifications were done in  
407 triplicates in a 7500 Real-Time PCR System (Applied Biosystem). Each reaction (20 $\mu$ l)  
408 contained 1 $\times$  Power SYBR-Green PCR MasterMix (Applied Biosystems), 0.4 $\mu$ M of each  
409 primer, and 5 ng template DNA. The 16S rRNA genes of bacterial origin were amplified using  
410 the primers Bac331f (5'-TCCTACGGGAGGCAGCAGT3') and Bac797r (5'-  
411 GGACTACCAGGGTCTAATCCTGTT-3') (44). Cycling conditions were 95°C for 10 min; and  
412 40 cycles at 95°C for 30 sec and 60°C for 30 sec and 72°C for 30 sec. Archaea were quantified  
413 using the primer set Arch349f (5'-GYGCASCAGKCGMGAAW-3') and Arch806r (5'-  
414 GGACTACVSGGGTATCTAAT-3') (45). Cycling conditions were 95°C for 10 min; and 40

415 cycles at 95°C for 30 sec and 50°C for 30 sec and 72°C for 30 sec. Triplicate standard curves  
416 were obtained with 10-fold serial dilutions ranged between  $10^7$  and  $10^{-2}$  copies per  $\mu\text{L}$  of  
417 plasmids. The efficiency of the reactions was up to 100% and the  $R^2$  of the standard curves were  
418 up to 0.999.

#### 419 *Cell visualization and counting by FISH*

420 At the start and at the end of the incubation period (11 weeks), 200  $\mu\text{L}$  of sample from each  
421 vessel was fixed in a final 2% paraformaldehyde solution for 4 h on ice. The samples were  
422 washed twice with 1x phosphate buffer saline solution (PBS). Then, it was stored in a mixture of  
423 PBS and ethanol (EtOH), with a PBS/EtOH ratio of 1:1 at -20°C as previously described by (3).  
424 This sample was used for cell counting and FISH analysis.

425 100  $\mu\text{L}$  of stored sample was diluted with nuclease free water, sonicated for 40 sec and then  
426 filtered on 0.2  $\mu\text{m}$  membrane filters. For cell counting, 200-300  $\mu\text{L}$  of 20x SYBR green solution  
427 (Takara, Japan) was added on top of the filter and incubated in the dark at room temperature for  
428 30min. The filters were dried and mounted on a glass slide with 100  $\mu\text{L}$  glycerol 10%. For FISH  
429 analysis, the filtrated sample was hybridized with the archaeal probe ARCH915 (46), the  
430 bacterial probe EUB I-III (47), with different CY3-labeled ANME probes: ANME-1 350 (3),  
431 ANME-2 538 (48), ANME-3 1249 (10) and the Cy5-labelled SRB specific probes for  
432 *Desulfosarcina / Desulfococcus* (DSS) DSS658 (3) and *Desulfobulbus* (DBB) DBB660 (49).  
433 Cells were counterstained with 4', 6-diamidino-2-phenylindole (DAPI) (50). The hybridization of  
434 the samples and microscopic visualization of the hybridized cells were performed as described  
435 previously (51).

#### 436 **Acknowledgements**

437 We acknowledge Filip Meysman from the Royal Netherlands Institute of Sea Research (NIOZ,  
438 Yerseke, The Netherlands) for providing the Lake Grevelingen sediment. The authors are  
439 grateful for using the analytical facilities of the Centre for Chemical Microscopy (ProVIS) at the  
440 Helmholtz-Centre for Environmental Research which is supported by European regional  
441 Development Funds (EFRE and Europe funds Saxony) and the Helmholtz Association. The  
442 authors acknowledge Dr. Niculina Musat (team leader of ProVIS) for her advice and practical  
443 support during FISH analysis. This research was funded by the Erasmus Mundus Joint Doctorate  
444 Programme ETeCoS<sup>3</sup> (Environmental Technologies for Contaminated Solids, Soils and  
445 Sediments) under the grant agreement FPA no. 2010-0009 and the National Natural Science  
446 Foundation of China (grant number: 41476123).

## 447 **References**

- 448 1. Reeburgh WS. 2007. Oceanic methane biogeochemistry. *Chem Rev* 107:486-513.
- 449 2. Yamamoto S, Alcauskas JB, Crozier TE. 1976. Solubility of methane in distilled water  
450 and seawater. *J Chem Eng Data* 21:78-80.
- 451 3. Boetius A, Ravensschlag K, Schubert CJ, Rickert D, Widdel F, Gieseke A, Amann R,  
452 Jørgensen BB, Witte U, Pfannkuche O. 2000. A marine microbial consortium apparently  
453 mediating anaerobic oxidation of methane. *Nature* 407:623-626.
- 454 4. Hinrichs KU, Hayes JM, Sylva SP, Brewer PG, DeLong EF. 1999. Methane-consuming  
455 archaeobacteria in marine sediments. *Nature* 398:802-805.
- 456 5. Knittel K, Lo T, Boetius A, Kort R, Amann R, Lösekann T. 2005. Diversity and  
457 distribution of methanotrophic archaea at cold seeps. *Appl Environ Microbiol* 71:467-  
458 479.

- 459 6. Deusner C, Meyer V, Ferdelman TG. 2009. High-pressure systems for gas-phase free  
460 continuous incubation of enriched marine microbial communities performing anaerobic  
461 oxidation of methane. *Biotechnol Bioeng* 105:524-533.
- 462 7. Krüger M, Treude T, Wolters H, Nauhaus K, Boetius A. 2005. Microbial methane  
463 turnover in different marine habitats. *Palaeogeogr Palaeoecol* 227:6-17.
- 464 8. Nauhaus K, Boetius A, Krüger M, Widdel F. 2002. In vitro demonstration of anaerobic  
465 oxidation of methane coupled to sulphate reduction in sediment from a marine gas  
466 hydrate area. *Environ Microbiol* 4:296-305.
- 467 9. Zhang Y, Henriot JP, Bursens J, Boon N. 2010. Stimulation of in vitro anaerobic  
468 oxidation of methane rate in a continuous high-pressure bioreactor. *Biores Technol*  
469 101:3132-3138.
- 470 10. Niemann H, Lösekann T, de Beer D, Elvert M, Nadalig T, Knittel K, Amann R, Sauter  
471 EJ, Schlüter M, Klages M, Foucher JP, Boetius A. 2006. Novel microbial communities of  
472 the Haakon Mosby mud volcano and their role as a methane sink. *Nature* 443:854-858.
- 473 11. Meulepas RJW, Jagersma CG, Khadem AF, Buisman CJN, Stams AJM, Lens PNL.  
474 2009. Effect of environmental conditions on sulfate reduction with methane as electron  
475 donor by an Eckemförde Bay enrichment. *Environ Sci Technol* 43:6553-6559.
- 476 12. Timmers PH, Gieteling J, Widjaja-Greefkes HA, Plugge CM, Stams AJM, Lens PNL,  
477 Meulepas RJ. 2015. Growth of anaerobic methane-oxidizing archaea and sulfate-reducing  
478 bacteria in a high-pressure membrane capsule bioreactor. *Appl Environ Microbiol*  
479 81:1286-1296.
- 480 13. Liamleam W, Annachhatre AP. 2007. Electron donors for biological sulfate reduction.  
481 *Biotechnol Adv* 25:452-463.

- 482 14. Sievert SM, Kiene RP, Schulz-Vogt HN. 2007. The sulfur cycle. *Oceanography* 20:117-  
483 123.
- 484 15. Weijma J, Veecken A, Dijkman H, Huisman J, Lens PNL. 2006. Heavy metal removal  
485 with biogenic sulphide: advancing to full-scale., p 321-333. *In* Cervantes F, Pavlostathis  
486 S, van Haandel A (ed), *Advanced biological treatment processes for industrial*  
487 *wastewaters, principles and applications*. IWA publishing, London.
- 488 16. Meulepas RJW, Stams AJM, Lens PNL. 2010. Biotechnological aspects of sulfate  
489 reduction with methane as electron donor. *Rev Environ Sci Biotechnol* 9:59-78.
- 490 17. Gonzalez-Gil G, Meulepas RJW, Lens PNL. 2011. Biotechnological aspects of the use of  
491 methane as electron donor for sulfate reduction, p 419-434. *In* Murray M-Y (ed),  
492 *Comprehensive biotechnology*, 2nd ed, vol 6. Elsevier B.V., Amsterdam, the  
493 Netherlands.
- 494 18. Bhattarai S, Cassarini C, Gonzalez-Gil G, Egger M, Slomp CP, Zhang Y, Esposito G,  
495 Lens PNL. 2017. Anaerobic methane-oxidizing microbial community in a coastal marine  
496 sediment: anaerobic methanotrophy dominated by ANME-3. *Microb Ecol* 74:608-622.
- 497 19. Lösekann T, Knittel K, Nadalig T, Fuchs B, Niemann H, Boetius A, Amann R. 2007.  
498 Diversity and abundance of aerobic and anaerobic methane oxidizers at the Haakon  
499 Mosby Mud Volcano, Barents Sea. *Appl Environ Microbiol* 73:3348-3362.
- 500 20. Vigneron A, Cruaud P, Pignet P, Caprais J-C, Cambon-Bonavita M-A, Godfroy A, Toffin  
501 L. 2013. Archaeal and anaerobic methane oxidizer communities in the Sonora Margin  
502 cold seeps, Guaymas Basin (Gulf of California). *ISME J* 7:1595-1608.
- 503 21. Valentine DL, Reeburgh WS, Hall R. 2000. New perspectives on anaerobic methane  
504 oxidation. *Environ Microbiol* 2:477-484.

- 505 22. Milucka J, Ferdelman TG, Polerecky L, Franzke D, Wegener G, Schmid M, Lieberwirth  
506 I, Wagner M, Widdel F, Kuypers MMM. 2012. Zero-valent sulphur is a key intermediate  
507 in marine methane oxidation. *Nature* 491:541-546.
- 508 23. Girguis PR, Cozen AE, De Long EF. 2005. Growth and population dynamics of  
509 anaerobic methane-oxidizing archaea and sulfate-reducing bacteria in a continuous-flow  
510 bioreactor. *Appl Environ Microbiol* 71:3725-3733.
- 511 24. Meulepas RJW, Jagersma CG, Zhang Y, Petrillo M, Cai H, Buisman CJN, Stams AJM,  
512 Lens PNL. 2010. Trace methane oxidation and the methane dependency of sulfate  
513 reduction in anaerobic granular sludge. *FEMS Microbiol Ecol* 72:261-271.
- 514 25. Timmers PHA, Suarez-Zuluaga DA, van Rossem M, Diender M, Stams AJM, Plugge  
515 CM. 2015. Anaerobic oxidation of methane associated with sulfate reduction in a natural  
516 freshwater gas source. *ISME J* 10:1400-1412.
- 517 26. Zhang Y, Li X, Bartlett DH, Xiao X. 2015. Current developments in marine  
518 microbiology: high-pressure biotechnology and the genetic engineering of piezophiles.  
519 *Curr Opin Microbiol* 33:157-164.
- 520 27. Omoregie EO, Mastalerz V, de Lange G, Straub KL, Kappler A, Røy H, Stadnitskaia A,  
521 Foucher J-P, Boetius A. 2008. Biogeochemistry and community composition of iron- and  
522 sulfur-precipitating microbial mats at the Chefren mud volcano (Nile Deep Sea Fan,  
523 Eastern Mediterranean). *Appl Environ Microbiol* 74:3198-3215.
- 524 28. Scheller S, Yu H, Chadwick GL, McGlynn SE, Orphan VJ. 2016. Artificial electron  
525 acceptors decouple archaeal methane oxidation from sulfate reduction. *Science* 351:703-  
526 707.



- 527 29. McGlynn SE, Chadwick GL, Kempes CP, Orphan VJ. 2015. Single cell activity reveals  
528 direct electron transfer in methanotrophic consortia. *Nature* 526:531-535.
- 529 30. Wegener G, Krukenberg V, Ruff SE, Kellermann MY, Knittel K. 2016. Metabolic  
530 capabilities of microorganisms involved in and associated with the anaerobic oxidation of  
531 methane. *Front Microbiol* 7:46.
- 532 31. Meulepas RJW, Jagersma CG, Gieteling J, Buisman CJN, Stams AJM, Lens PNL. 2009.  
533 Enrichment of anaerobic methanotrophs in sulfate-reducing membrane bioreactors.  
534 *Biotechnol Bioeng* 104:458-470.
- 535 32. Deutzmann JS, Schink B. 2011. Anaerobic oxidation of methane in sediments of Lake  
536 Constance, an oligotrophic freshwater lake. *Appl Environ Microbiol* 77:4429-4436.
- 537 33. Suarez-Zuluaga DA, Timmers PHA, Plugge CM, Stams AJM, Buisman CJN, Weijma J.  
538 2016. Thiosulphate conversion in a methane and acetate fed membrane bioreactor.  
539 *Environ Sci Pollut* 23:2467-2478.
- 540 34. Egger M, Lenstra W, Jong D, Meysman FJR, Sapart CJ, van der Veen C, Röckmann T,  
541 Gonzalez S, Slomp CP. 2016. Rapid sediment accumulation results in high methane  
542 effluxes from coastal sediments. *PloS ONE* 11:e0161609.
- 543 35. Hagens M, Slomp CP, Meysman FJR, Seitaj D, Harlay J, Borges AV, Middelburg JJ.  
544 2015. Biogeochemical processes and buffering capacity concurrently affect acidification  
545 in a seasonally hypoxic coastal marine basin. *Biogeosciences* 12:1561-1583.
- 546 36. Sulu-Gambari F, Seitaj D, Meysman FJR, Schauer R, Polerecky L, Slomp CP. 2016.  
547 Cable bacteria control iron–phosphorus dynamics in sediments of a coastal hypoxic  
548 basin. *Environ Sci Technol* 50:1227-1233.

- 549 37. Shigematsu T, Tang Y, Kobayashi T, Kawaguchi H, Morimura S, Kida K. 2004. Effect  
550 of dilution rate on metabolic pathway shift between acetoclastic and nonacetoclastic  
551 methanogenesis in chemostat cultivation. *Appl Environ Microbiol* 70:4048-4052.
- 552 38. Kamyshny A, Ekeltchik I, Gun J, Lev O. 2006. Method for the determination of  
553 inorganic polysulfide distribution in aquatic systems. *Anal Chem* 78:2631-2639.
- 554 39. Kamyshny A, Borkenstein CG, Ferdelman TG. 2009. Protocol for quantitative detection  
555 of elemental sulfur and polysulfide zero-valent sulfur distribution in natural aquatic  
556 samples. *Geostand Geoanal Res* 33:415-435.
- 557 40. Kamyshny A, Goifman A, Gun J, Rizkov D, Lev O. 2004. Equilibrium distribution of  
558 polysulfide ions in aqueous solutions at 25 °C: a new approach for the study of  
559 polysulfides' equilibria. *Environ Sci Technol* 38:6633-6644.
- 560 41. APHA. 1995. Standard methods for the examination of water and wastewater,  
561 Washington DC, USA.
- 562 42. Zhang Y, Maignien L, Stadnitskaia A, Boeckx P, Xiao X, Boon N. 2014. Stratified  
563 community responses to methane and sulfate supplies in mud volcano deposits: insights  
564 from an in vitro experiment. *PLoS ONE* 9:e113004.
- 565 43. Song Z-Q, Wang F-P, Zhi X-Y, Chen J-Q, Zhou E-M, Liang F, Xiao X, Tang S-K, Jiang  
566 H-C, Zhang CL, Dong H, Li W-J. 2013. Bacterial and archaeal diversities in Yunnan and  
567 Tibetan hot springs, China. *Environ Microbiol* 15:1160-1175.
- 568 44. Nadkarni MA, Martin FE, Jacques NA, Hunter N. 2002. Determination of bacterial load  
569 by real-time PCR using a broad-range (universal) probe and primers set. *Microbiology*  
570 148:257-266.

- 571 45. Takai K, Horikoshi K. 2000. Rapid detection and quantification of members of the  
572 archaeal community by quantitative PCR using fluorogenic probes. *Appl Environ*  
573 *Microbiol* 66:5066-5072.
- 574 46. Stahl DA. 1991. Development and application of nucleic acid probes, p 205-248. *In*  
575 *Stackebrandt E, Goodfellow M (ed), Nucleic acid techniques in bacterial systematics.*  
576 *John Wiley & Sons, Chichester, UK.*
- 577 47. Daims H, Brühl A, Amann R, Schleifer K-H, Wagner M. 1999. The domain-specific  
578 probe EUB338 is insufficient for the detection of all bacteria: development and  
579 evaluation of a more comprehensive probe set. *Syst Appl Microbiol* 22:434-444.
- 580 48. Treude T, Knittel K, Blumenberg M, Seifert R, Boetius A. 2005. Subsurface microbial  
581 methanotrophic mats in the Black Sea *Appl Environ Microbiol* 71:6375-6378.
- 582 49. Daly K, Sharp RJ, McCarthy AJ. 2000. Development of oligonucleotide probes and PCR  
583 primers for detecting phylogenetic subgroups of sulfate-reducing bacteria. *Microbiology*  
584 146:1693-1705.
- 585 50. Wagner M, Amann R, Lemmer H, Schleifer KH. 1993. Probing activated sludge with  
586 oligonucleotides specific for proteobacteria: inadequacy of culture-dependent methods  
587 for describing microbial community structure *Appl Environ Microbiol* 59:1520-1525.
- 588 51. Snaidr J, Amann R, Huber I, Ludwig W, Schleifer KH. 1997. Phylogenetic analysis and  
589 in situ identification of bacteria in activated sludge. *Appl Environ Microbiol* 63:2884-  
590 2896.
- 591 52. Duan Z, Mao S. 2006. A thermodynamic model for calculating methane solubility,  
592 density and gas phase composition of methane-bearing aqueous fluids from 273 to 523K  
593 and from 1 to 2000bar. *Geochim Cosmochim Ac* 70:3369-3386.

594 **Tables**

595 **Table 1.** Gibbs free energy of AOM coupled to SR ( $\Delta_r G'$ ) at different CH<sub>4</sub> total pressures and  
 596 assuming the following *in vitro* conditions: temperature 15°C, pH 7.0, HCO<sub>3</sub><sup>-</sup> 30 mM, SO<sub>4</sub><sup>2-</sup> 10  
 597 mM and HS<sup>-</sup> 0.01 mM. The maximum dissolved CH<sub>4</sub> concentration at a salinity of 32‰ and  
 598 15°C at different CH<sub>4</sub> partial pressure was determined by the Duan model (52). AOM and SR  
 599 rates determined in this (marine Lake Grevelingen sediment) and other studies. <sup>a</sup> = data from  
 600 Timmers et al. (12): AOM-SR rate of Eckernförde sediment based on <sup>13</sup>C- carbonate species  
 601 production and <sup>b</sup> = data from Zhang et al. (9): AOM-SR activity of Capt Aryutinov Mud Volcano  
 602 sediment based on sulfide production.

| Pressure<br>(MPa) | Concentration<br>(mM) | $\Delta_r G'$ (KJ mol <sup>-1</sup> )      | AOM rate                                                     |                                                              | SR rate                                                      |                                                              | AOM-SR rate                                                  |                                                              |
|-------------------|-----------------------|--------------------------------------------|--------------------------------------------------------------|--------------------------------------------------------------|--------------------------------------------------------------|--------------------------------------------------------------|--------------------------------------------------------------|--------------------------------------------------------------|
|                   |                       |                                            | ( $\mu\text{mol g}_{\text{vss}}^{-1}$<br>day <sup>-1</sup> ) | ( $\mu\text{mol g}_{\text{vss}}^{-1}$<br>day <sup>-1</sup> ) | ( $\mu\text{mol g}_{\text{vss}}^{-1}$<br>day <sup>-1</sup> ) | ( $\mu\text{mol g}_{\text{vss}}^{-1}$<br>day <sup>-1</sup> ) | ( $\mu\text{mol g}_{\text{vss}}^{-1}$<br>day <sup>-1</sup> ) | ( $\mu\text{mol g}_{\text{vss}}^{-1}$<br>day <sup>-1</sup> ) |
|                   |                       |                                            | This study                                                   |                                                              |                                                              | Other studies                                                |                                                              |                                                              |
| 0.1               | 1.4                   | -25.8 kJ mol <sup>-1</sup> CH <sub>4</sub> | 186.4                                                        |                                                              | 257.4                                                        |                                                              | 5.8 <sup>a</sup>                                             |                                                              |
| 0.2               | 2.9                   | -27.5 kJ mol <sup>-1</sup> CH <sub>4</sub> | -                                                            |                                                              |                                                              |                                                              | 0.18 <sup>b</sup>                                            |                                                              |
| 0.45              | 6.4                   | -29.4 kJ mol <sup>-1</sup> CH <sub>4</sub> | 324.0                                                        |                                                              | 297                                                          |                                                              | -                                                            |                                                              |
| 1                 | 14.0                  | -31.3 kJ mol <sup>-1</sup> CH <sub>4</sub> | -                                                            |                                                              |                                                              |                                                              | 3.46 <sup>b</sup>                                            |                                                              |
| 4.5               | 55.6                  | -34.6 kJ mol <sup>-1</sup> CH <sub>4</sub> | -                                                            |                                                              |                                                              |                                                              | 8.64 <sup>b</sup>                                            |                                                              |
| 8                 | 87.3                  | -35.7 kJ mol <sup>-1</sup> CH <sub>4</sub> | -                                                            |                                                              |                                                              |                                                              | 9.22 <sup>b</sup>                                            |                                                              |
| 10                | 101.9                 | -36.1 kJ mol <sup>-1</sup> CH <sub>4</sub> | 109.5                                                        |                                                              | 277.6                                                        |                                                              | 20.9 <sup>a</sup>                                            |                                                              |
| 20                | 149.8                 | -37.0 kJ mol <sup>-1</sup> CH <sub>4</sub> | 91.7                                                         |                                                              | 162.4                                                        |                                                              | -                                                            |                                                              |
| 40                | 198                   | -37.7 kJ mol <sup>-1</sup> CH <sub>4</sub> | 38.5                                                         |                                                              | 154.3                                                        |                                                              | -                                                            |                                                              |

603

604 **Figure legends**

605 **Figure 1.** (a) Sulfide production rate, (b) SR rate and AOM rate for incubations at different  
606 pressure and controls without CH<sub>4</sub>, but with N<sub>2</sub> in the headspace and without biomass. Error bars  
607 indicate the standard deviation (n=3).

608 **Figure 2.** Concentration profiles of total dissolved sulfide (◆), sulfate (■) and elemental sulfur  
609 (▲) for the incubation at (a) 0.1MPa, (b) 0.45 MPa, (c) 10 MPa, (d) 20 MPa, (e) 40 MPa, (f)  
610 without CH<sub>4</sub>, and (g) without biomass. Error bars indicate the standard deviation (n=3).

611 **Figure 3.** Total dissolved sulfide (◆) and polysulfides concentration, namely S<sub>2</sub><sup>2-</sup> (●), S<sub>3</sub><sup>2-</sup> (✕),  
612 S<sub>4</sub><sup>2-</sup> (✕), S<sub>5</sub><sup>2-</sup> (■). S<sub>6</sub><sup>2-</sup> (▲), during the incubation of Grevelingen sediment at (a) 0.45 MPa, (b)  
613 0.1MPa, (c) 10 MPa, (d) 20 MPa, and (e) 40 MPa. Error bars indicate the standard deviation  
614 (n=3).

615 **Figure 4.** (a) Total number of active cells and (b) number of copies of archaea and bacteria from  
616 Q-PCR analysis per ml of wet sediment in each pressurized vessel at the start (t=0 days) and at  
617 the end of the incubation (t=77 days). Error bars indicate the standard deviation (n=3).

618 **Figure 5.** Heat map of top most abundant 16s rRNA sequences at the beginning (t=0) and at the  
619 end of the incubations (t=77 days) of the marine Lake Grevelingen sediment at different CH<sub>4</sub>  
620 pressures and control without CH<sub>4</sub> in the headspace showing the phylogenetic affiliation up to  
621 family level as derived by high throughput sequencing of (a) archaea and (b) bacteria.

622 **Figure 6.** FISH images (a-c) from CY3-labeled ANME-3 in red color, CY5-labeled  
623 *Desulfobulbus* (DBB) in green after 77 days of incubation at (a) 0.1 MPa, (b) 0.45 MPa and (c)  
624 20 MPa total CH<sub>4</sub> pressure. FISH images (d-f) from CY3-labeled ANME-2 in red color, CY5-

625 labeled *Desulforsarcina/Desulfococcus* group (DSS) in green after 77 days of incubation at (a)  
626 0.45 MPa, (b) 20 MPa and (c) 40 MPa total CH<sub>4</sub> pressure. White scale bar representing 10 μm.

### 627 **Supplemental Material Legends**

628 **Figure S1.** (a) CH<sub>4</sub> production rates were calculated from the linear regression over at least four  
629 successive measurements in which the calculated <sup>12</sup>CH<sub>4</sub> increase over time was linear. (b) The  
630 CH<sub>4</sub> produced was calculated from the <sup>12</sup>CH<sub>4</sub>. Methanogenic activity and CH<sub>4</sub> produced during  
631 AOM were determined for incubations at different pressures and controls without CH<sub>4</sub>, but with  
632 N<sub>2</sub> in the headspace and without biomass. Error bars indicate the standard deviation (n=4).

633 **Figure S2.** Concentration profiles of methane oxidized (<sup>13</sup>CH<sub>4</sub>, ) and dissolved inorganic  
634 carbon (DIC, ) calculated from the produced <sup>13</sup>CO<sub>2</sub>) during the incubation of marine Lake  
635 Grevelingen sediment at (a) 0.1 MPa, (b) 0.45 MPa, (c) 10 MPa, (d) 20 MPa and (e) 40 MPa.

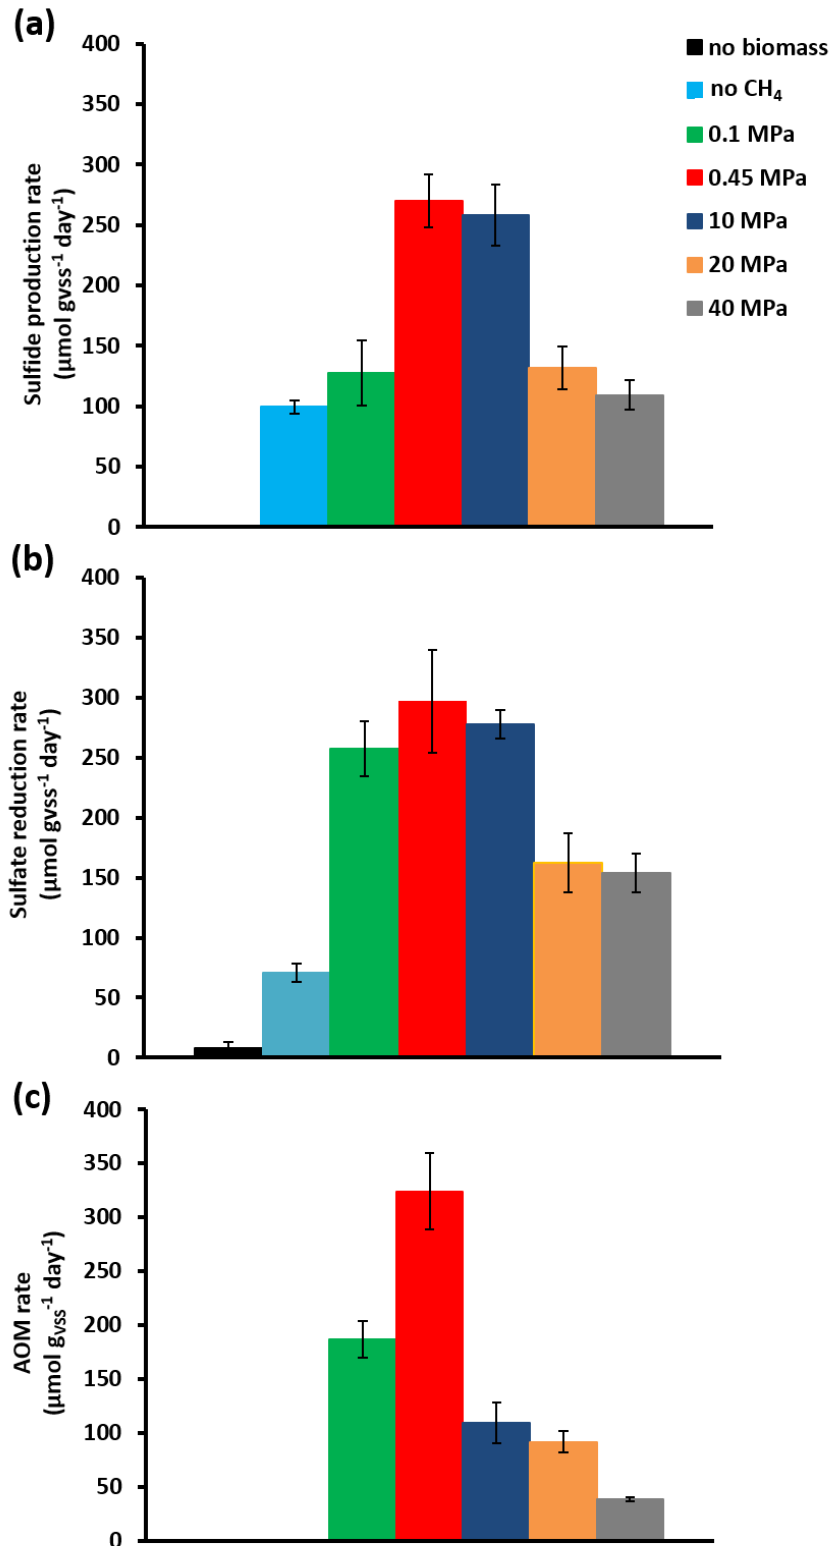

**Figure 1.** (a) Sulfide production rate, (b) SR rate and AOM rate for incubations at different pressure and controls without  $\text{CH}_4$ , but with  $\text{N}_2$  in the headspace and without biomass. Error bars indicate the standard deviation (n=3).



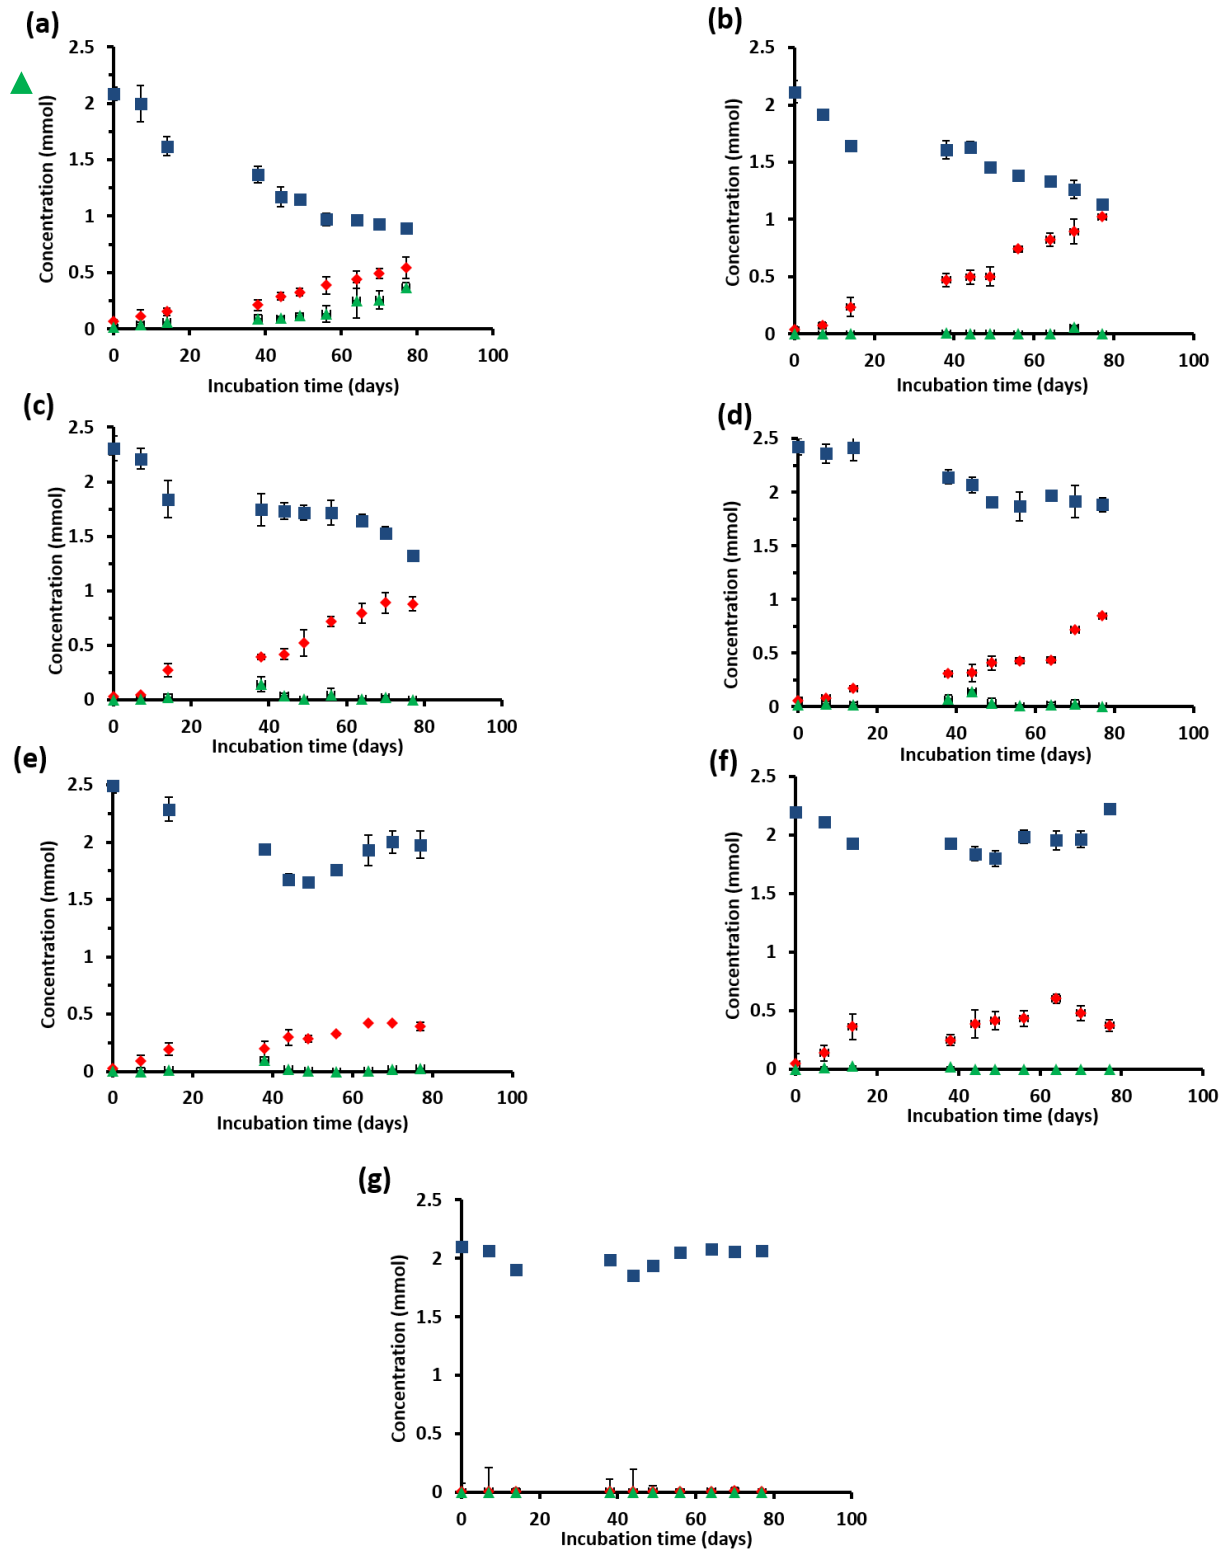

**Figure 2.** Concentration profiles of total dissolved sulfide (◆), sulfate (■) and elemental sulfur (▲) for the incubation at (a) 0.1 MPa, (b) 0.45 MPa, (c) 10 MPa, (d) 20 MPa, (e) 40 MPa, (f) without CH<sub>4</sub>, and (g) without biomass. Error bars indicate the standard deviation (n=3).

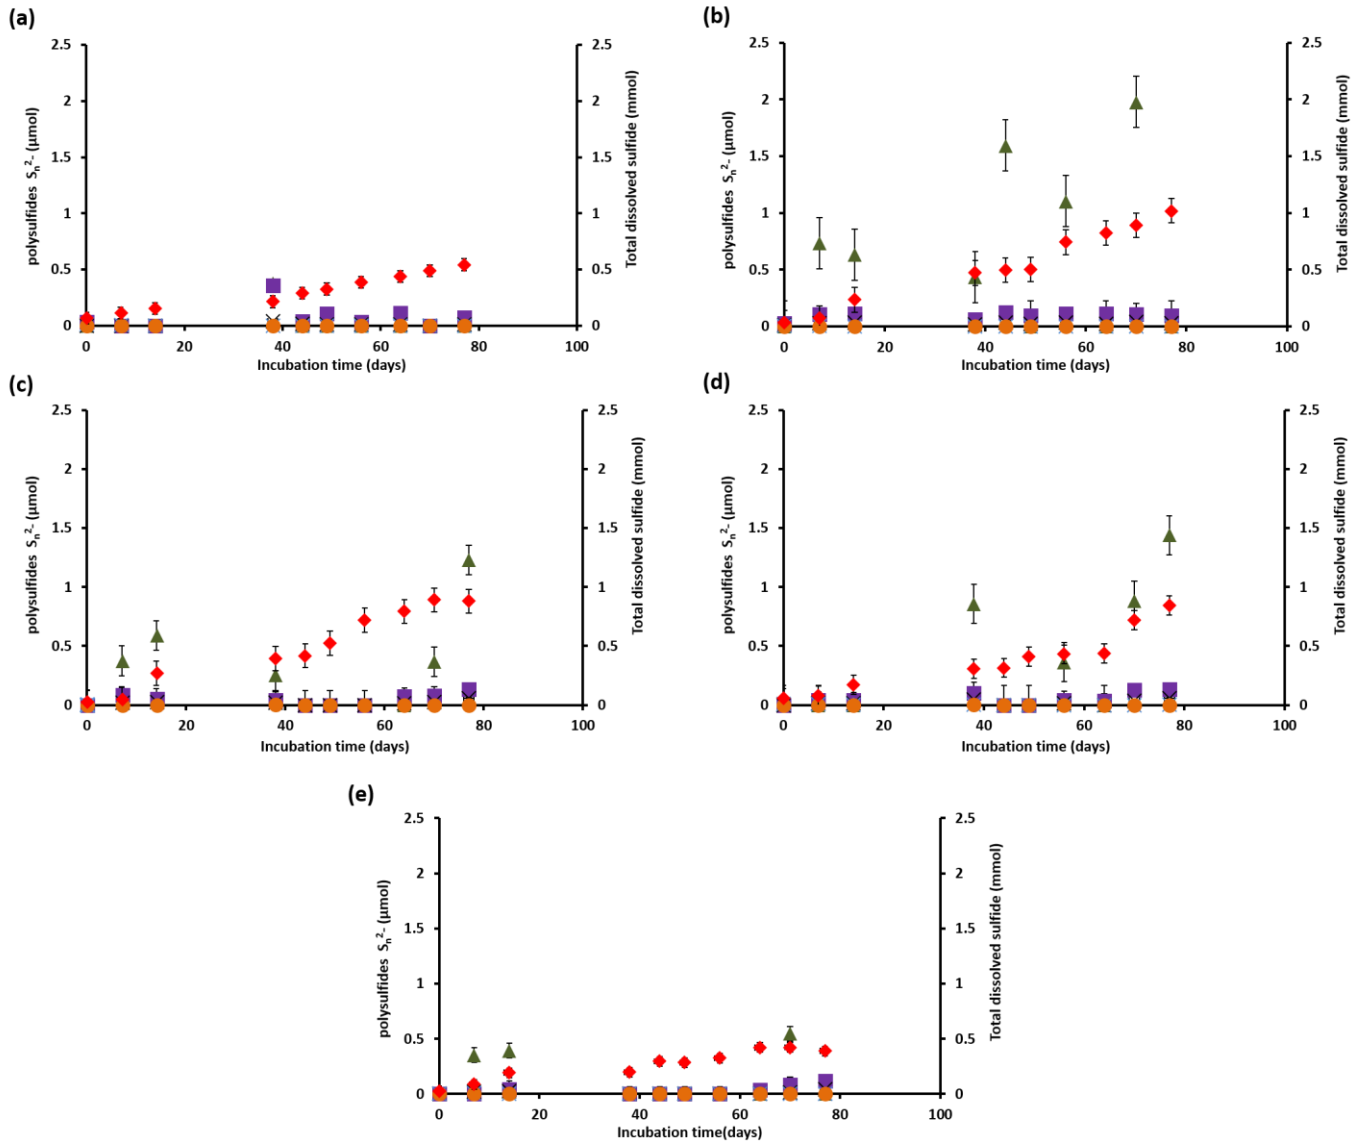

**Figure 3.** Total dissolved sulfide ( $\blacklozenge$ ) and polysulfides concentration, namely  $S_2^{2-}$  ( $\bullet$ ),  $S_3^{2-}$  ( $\times$ ),  $S_4^{2-}$  ( $\times$ ),  $S_5^{2-}$  ( $\blacksquare$ ),  $S_6^{2-}$  ( $\blacktriangle$ ), during the incubation of Grevelingen sediment at (a) 0.45 MPa, (b) 0.1MPa, (c) 10 MPa, (d) 20 MPa, and (e) 40 MPa. Error bars indicate the standard deviation (n=3).

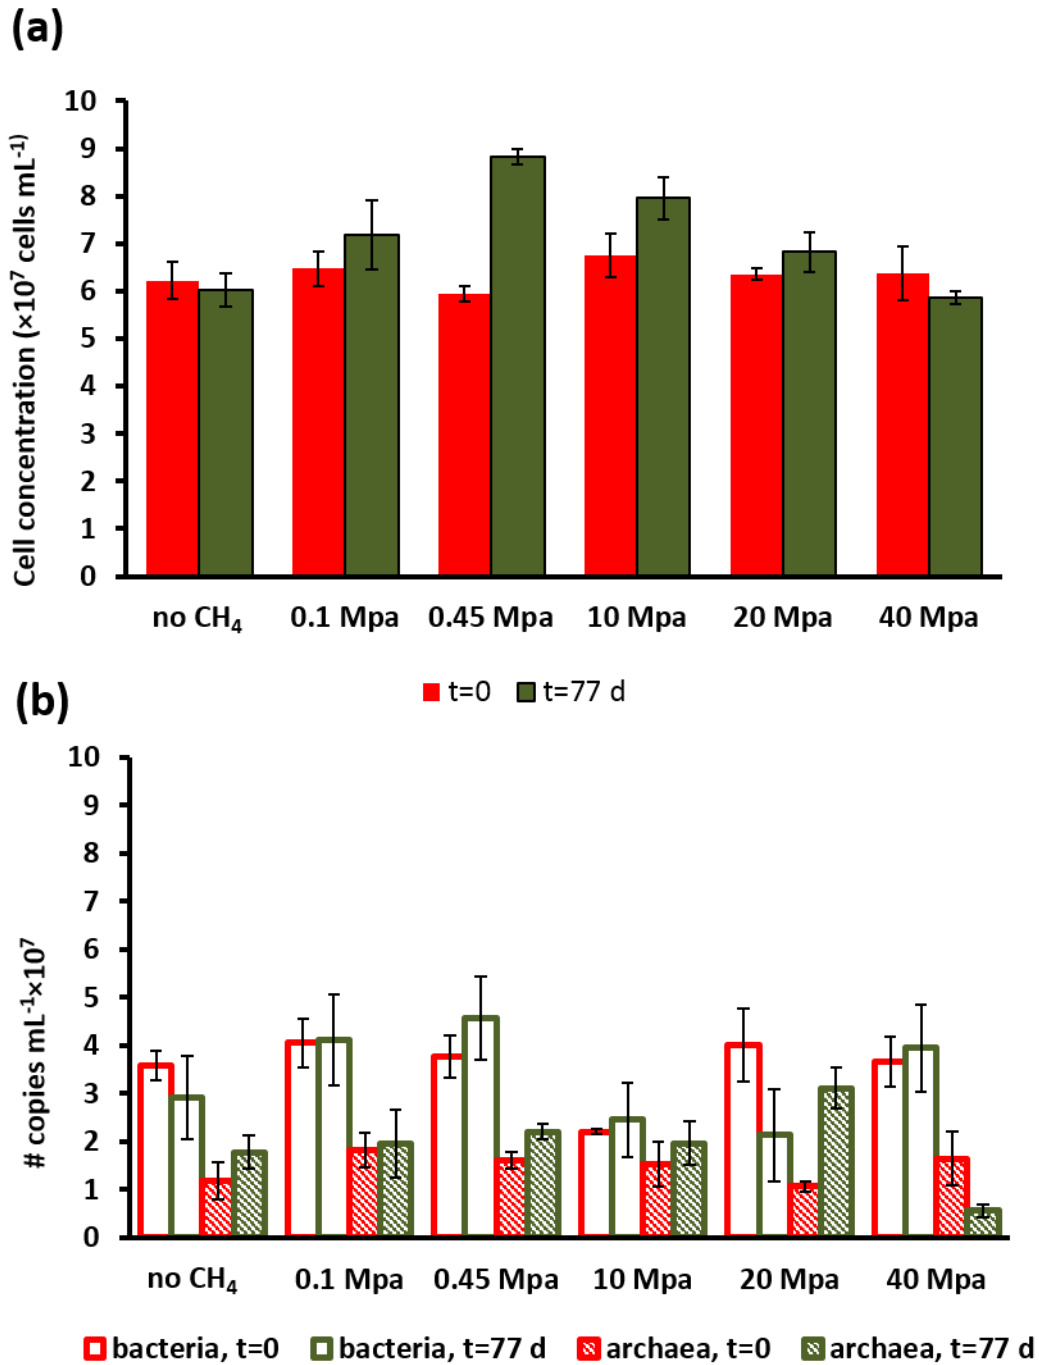

**Figure 4.** (a) Total number of active cells and (b) number of copies of archaea and bacteria from Q-PCR analysis per ml of wet sediment in each pressurized vessel at the start (t=0 days) and at the end of the incubation (t=77 days). Error bars indicate the standard deviation (n=3).

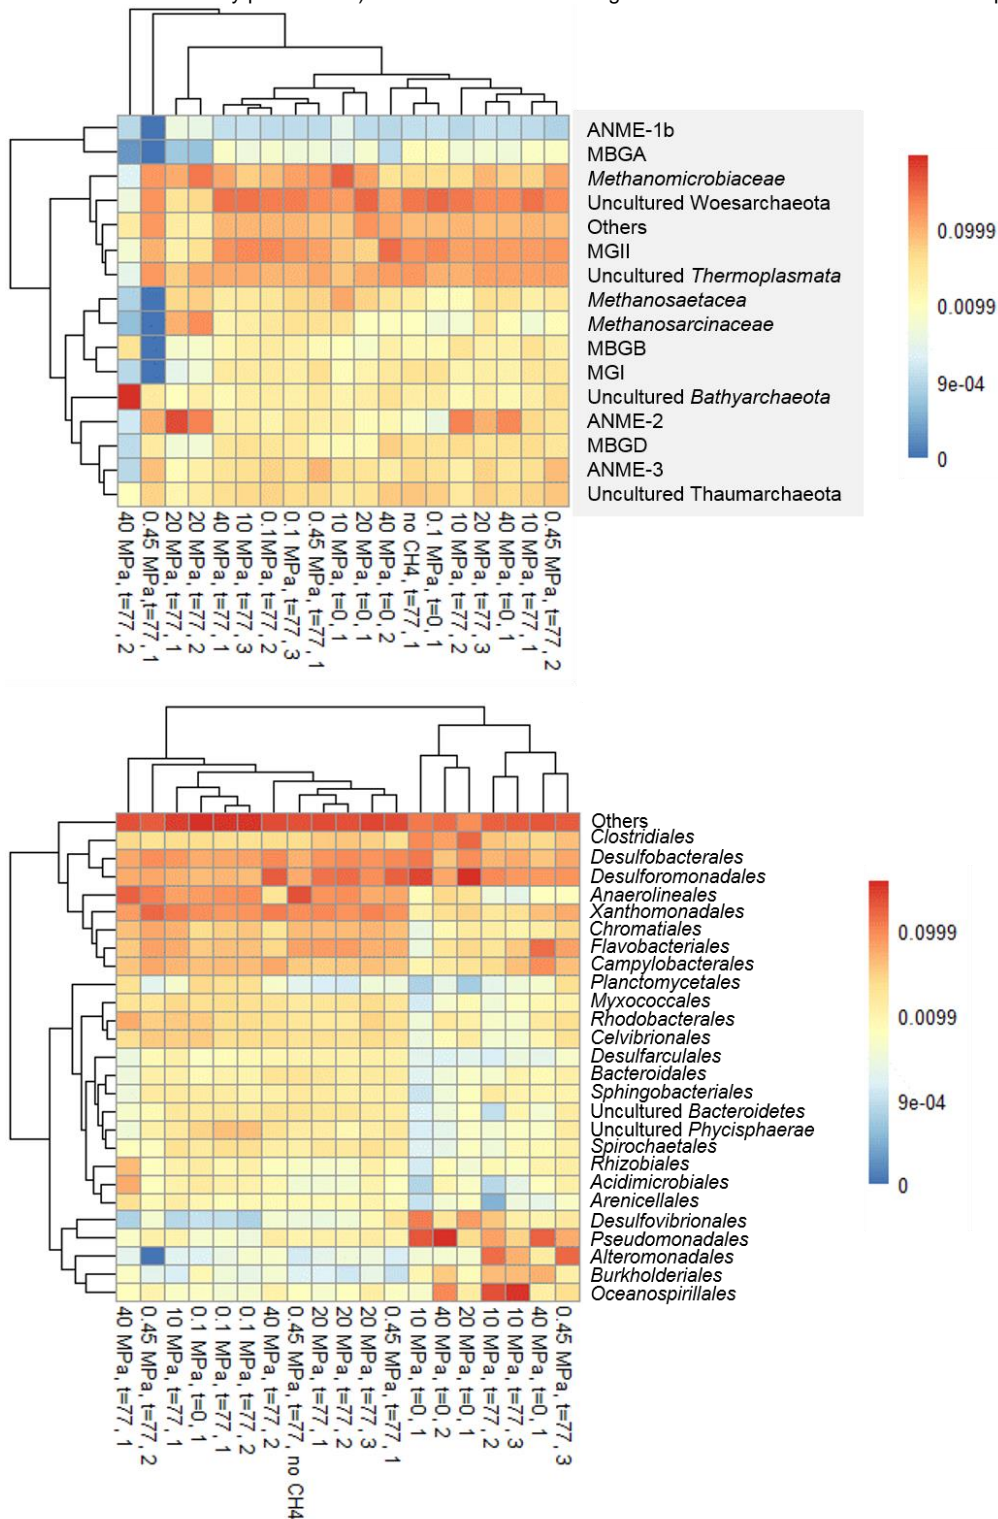

**Figure 5.** Heat map of top most abundant 16s rRNA sequences at the beginning (t=0) and at the end of the incubations (t=77 days) of the marine Lake Grevelingen sediment at different CH<sub>4</sub> pressures and control without CH<sub>4</sub> in the headspace showing the phylogenetic affiliation up to family level as derived by high throughput sequencing of (a) archaea and (b) bacteria.

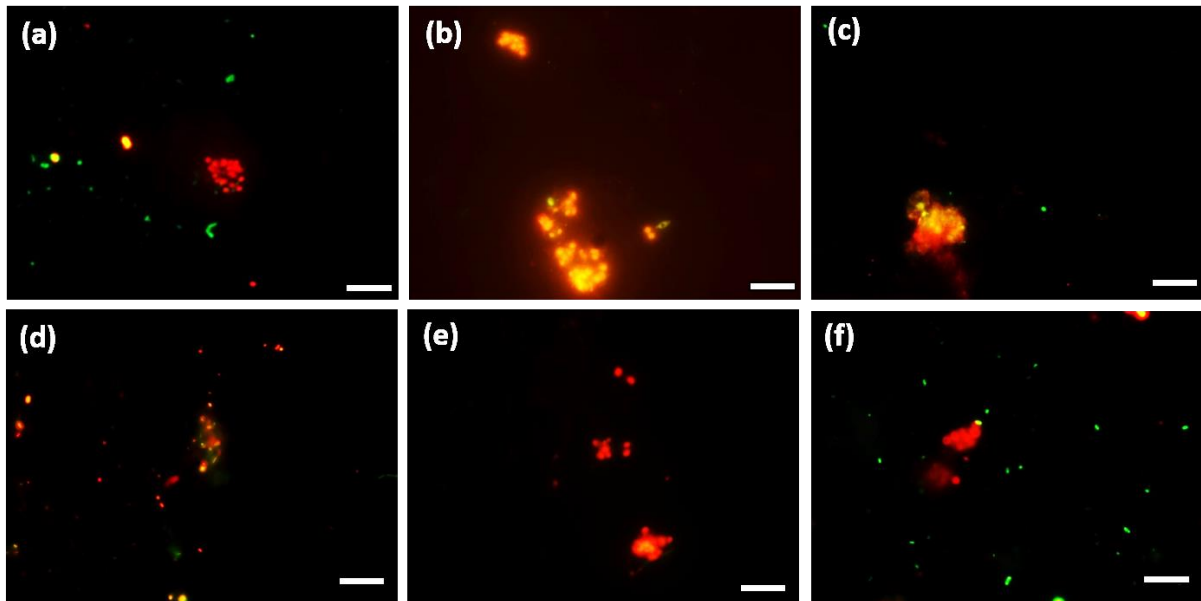

**Figure 6.** FISH images (a-c) from CY3-labeled ANME-3 in red color, CY5-labeled *Desulfobulbus* (DBB) in green after 77 days of incubation at (a) 0.1 MPa, (b) 0.45 MPa and (c) 20 MPa total CH<sub>4</sub> pressure. FISH images (d-f) from CY3-labeled ANME-2 in red color, CY5-labeled *Desulfosarcina/Desulfococcus* group (DSS) in green after 77 days of incubation at (a) 0.45 MPa, (b) 20 MPa and (c) 40 MPa total CH<sub>4</sub> pressure. White scale bar representing 10 μm.
